# Supplementary material for: The process, outcomes and context of the sanitation change induced by the Swachh Bharat Mission in rural Jharkhand, India
Source: Springer Nature journal article supplement (doi:10.1186/s12889-024-18388-y), 2024-04-12
Supplement: MOESM1 [file 26972148]

## SUPPLEMENTARY MATERIALS

### Supplementary material S1: Information on semi-structured interviews and FGDs

| Type of interviewees/FGD participants                              | Description of position                                                       | Number of interviews   | Notes                                                                                                                        |
|--------------------------------------------------------------------|-------------------------------------------------------------------------------|------------------------|------------------------------------------------------------------------------------------------------------------------------|
| Jal Sahiyas                                                        | Community WASH change agents                                                  | 13 interviews + 2 FGDs | All females. FGDs conducted with groups of 18 and 2 participants. Includes 1 pre-test interview. Plus 1 follow-up interview. |
| Mukhiyas                                                           | Panchayat headpersons                                                         | 15 interviews          | 11 females and 9 males. Includes 3 pre-test interviews. Plus 2 follow-up interviews.                                         |
| Rural Health Workers                                               | Community childcare workers, Community health volunteers, Traditional healers | 12 interviews + 4 FGDs | 10 females and 2 males. FGDs with groups of 2, 3, 3, and 9 participants                                                      |
| Other interviewees/FGD participants at village and Panchayat level | Villagers in various positions not directly related to WASH                   | 9 interviews + 2 FGDs  | 7 males and 2 females. FGDs with groups of 4 and 4 participants. Plus 1 follow-up interview.                                 |
| Higher level SBM Implementers                                      | Sanitation experts and government SBM staff from the block to state levels    | 11 interviews + 3 FGDs | 11 males and 1 female. FGDs with groups of 2, 2 and 6 participants. Plus 3 follow-up interviews.                             |

### Supplementary material S2: Structural variables examined in the regression analyses with their basic descriptive statistics

|                                                     | 2016          | 2019          |
|-----------------------------------------------------|---------------|---------------|
| <b><i>Demographic characteristics</i></b>           |               |               |
| Age of respondent – mean age (SD)                   | 32.57 (11.89) | 35.55 (13.26) |
| Share of female respondents                         | 0.56          | 0.46          |
| Share of female household heads                     | 0.13          | 0.19          |
| Household size – mean size (SD)                     | 5.96 (2.54)   | 5.78 (2.03)   |
| Share of households with elderly (above 50) members | 0.51          | 0.58          |
| Share of households with children (under 5)         | 0.38          | 0.39          |
| Share of households with disabled people            | 0.06          | 0.08          |
| <b><i>Sociocultural variables</i></b>               |               |               |
| <i>Religion (relative shares):</i>                  |               |               |
| Hindu                                               | 0.59          | 0.57          |
| Muslim                                              | 0.07          | 0.08          |
| Christian                                           | 0.05          | 0.06          |

|                                                                                                                         |                       |                      |
|-------------------------------------------------------------------------------------------------------------------------|-----------------------|----------------------|
| Sarna                                                                                                                   | 0.29                  | 0.29                 |
| <i>Social category (relative shares):</i>                                                                               |                       |                      |
| Scheduled castes                                                                                                        | 0.07                  | 0.06                 |
| Scheduled tribes                                                                                                        | 0.45                  | 0.49                 |
| Other backward classes                                                                                                  | 0.44                  | 0.40                 |
| Other                                                                                                                   | 0.04                  | 0.05                 |
| <b><i>Socioeconomic variables</i></b>                                                                                   |                       |                      |
| <i>Attained education of respondent; of household head; higher of household's head or respondent (relative shares):</i> |                       |                      |
| No                                                                                                                      | 0.32; 0.36; 0.20      | 0.38; 0.48; 0.29     |
| Up to lower secondary                                                                                                   | 0.38; 0.51; 0.47      | 0.40; 0.42; 0.46     |
| Higher secondary                                                                                                        | 0.18; 0.07; 0.19      | 0.13; 0.06; 0.14     |
| College                                                                                                                 | 0.13; 0.06; 0.14      | 0.09; 0.04; 0.11     |
| Annual household income in Rs. – median; mean (SD)                                                                      | 66000; 88802 (118286) | 60000; 60660 (39352) |
| Land ownership in Acres – median; mean (SD)                                                                             | 0.50; 0.87 (1.47)     | 0.50; 0.92 (1.51)    |
| Share of functionally landless                                                                                          | 0.41                  | 0.36                 |
| <i>Primary source of households' livelihood – relative shares:</i>                                                      |                       |                      |
| Farming                                                                                                                 | 0.22                  | 0.29                 |
| Casual labour                                                                                                           | 0.48                  | 0.45                 |
| Self-employment                                                                                                         | 0.15                  | 0.13                 |
| Regular employment, private or public                                                                                   | 0.15                  | 0.13                 |
| Ownership of land in acres – median; mean (SD)                                                                          | 0.50; 0.87 (1.47)     | 0.50; 0.92 (1.52)    |
| Type of house (relative shares)                                                                                         |                       |                      |
| Mud-walled and similar                                                                                                  | 0.51                  | 0.51                 |
| Semi-concrete or semi-mud-walled                                                                                        | 0.29                  | 0.33                 |
| Concrete                                                                                                                | 0.20                  | 0.16                 |
| <i>Change in economic situation over past two years (relative shares):</i>                                              |                       |                      |
| Improved                                                                                                                | 0.41                  | 0.28                 |
| Same                                                                                                                    | 0.52                  | 0.63                 |
| Worsened                                                                                                                | 0.07                  | 0.08                 |

**Supplementary material S3:** Psychosocial variables, their explanation, and basic descriptive statistics

|                                                                                                                                               | 2016                         | 2019                         |
|-----------------------------------------------------------------------------------------------------------------------------------------------|------------------------------|------------------------------|
| <b><i>Sanitation- and hygiene-related knowledge</i></b>                                                                                       |                              |                              |
| <i>Knowledge of hygiene and sanitation messages – asked as open questions and then classified into 10 predefined types of responses.</i>      |                              |                              |
| Sum of relevant messages – range; average (SD):                                                                                               | 0-6; 1.51 (1.66)             | 0-5; 0.83 (1.38)             |
| <i>Awareness about diarrhoea prevention – binary variable based on question to list the three most effective ways of preventing diarrhoea</i> |                              |                              |
| Share of those with at least some awareness:                                                                                                  | 0.15                         | 0.20                         |
| <b><i>Perception of descriptive and injunctive social norms around toilet use</i></b>                                                         |                              |                              |
| “Do other people in your village mostly use a toilet?” – All of them; Majority; Minority; None; Don't know                                    | 0.01; 0.05; 0.57; 0.23; 0.14 | 0.10; 0.65; 0.18; 0.01; 0.07 |
| Do you think that other people in your village should defecate in a toilet? – All of them; Majority; Minority; None; Don't know               | 0.87; 0.00; 0.08; 0.03; 0.02 | 0.84; 0.11; 0.03; 0.00; 0.01 |

|                                                                                                                                                                                                                                                                                                                                                                                                                      |                                 |                                 |
|----------------------------------------------------------------------------------------------------------------------------------------------------------------------------------------------------------------------------------------------------------------------------------------------------------------------------------------------------------------------------------------------------------------------|---------------------------------|---------------------------------|
| People in this village think you should use a toilet for defecation – Strongly agree; Agree; Disagree; Strongly disagree; Don't know                                                                                                                                                                                                                                                                                 | 0.53; 0.30; 0.02;<br>0.01; 0.14 | 0.33; 0.58; 0.01;<br>0.00; 0.08 |
| Do people in your village defecate in the open even though they have a toilet – All of them; Majority; Minority; None; Don't know                                                                                                                                                                                                                                                                                    | -                               | 0.01; 0.10; 0.70;<br>0.11; 0.08 |
| If you weren't forced to use the toilet, you would prefer open defecation – Strongly agree; Agree; Disagree; Strongly disagree; Don't know                                                                                                                                                                                                                                                                           | -                               | 0.01; 0.09; 0.21;<br>0.66; 0.03 |
| <b><u>Attitudinal variables</u></b>                                                                                                                                                                                                                                                                                                                                                                                  |                                 |                                 |
| <i>Perceived advantages of toilet</i> – asked as open question and then classified into predefined types of responses. Used for constructing individual binary variables of perceived types of toilet advantages.<br>Sum of perceived advantages – average (SD)                                                                                                                                                      | 2.67 (1.17)                     | 4.16 (1.44)                     |
| <i>Perceived disadvantages of OD</i> – asked as open question and then classified into predefined types of responses. Used for constructing individual binary variables of perceived types of OD disadvantages.<br>Sum of perceived disadvantages – average (SD)                                                                                                                                                     | 2.30 (1.12)                     | 2.93 (1.36)                     |
| <i>Satisfaction with current defecation practice</i> – Average (SD) based on 5-point scale: 1. Very satisfied; 2. Satisfied; 3. Neither satisfied nor dissatisfied; 4. Not satisfied; 5. Very dissatisfied                                                                                                                                                                                                           |                                 |                                 |
| Toilet owners                                                                                                                                                                                                                                                                                                                                                                                                        | 1.85 (0.99)                     | 1.53 (0.63)                     |
| Toilet non-owners                                                                                                                                                                                                                                                                                                                                                                                                    | 4.17 (0.75)                     | 3.64 (1.30)                     |
| All respondents                                                                                                                                                                                                                                                                                                                                                                                                      | 3.50 (1.33)                     | 1.79 (1.02)                     |
| <i>Willingness to pay for toilet</i> – constructed based on the following sequence of questions:<br>“Just imagine if you didn't have your toilet, would you pay at least 12,000 Rs. of your own money for a SBM type toilet?” ... “If no, would you pay 6,000 Rs. of your own money for a SBM type toilet?” ... “If no, how much would you pay for an SBM toilet (of your own money)?”<br>Distribution of responses: |                                 |                                 |
| If only for free                                                                                                                                                                                                                                                                                                                                                                                                     | 0.22                            | 0.31                            |
| More than 0 Rs. but than 6000 Rs.                                                                                                                                                                                                                                                                                                                                                                                    | 0.13                            | 0.06                            |
| More than 6000 Rs. but less than 12000 Rs.                                                                                                                                                                                                                                                                                                                                                                           | 0.17                            | 0.18                            |
| Willing to pay 12000 Rs. or more                                                                                                                                                                                                                                                                                                                                                                                     | 0.48                            | 0.45                            |
| <i>Willingness to pay for toilet</i> – constructed based on the following sequence of questions:<br>“Just imagine if you didn't have your toilet, would you pay at least 12,000 Rs. of your own money for a SBM type toilet?” ... “If no, would you pay 6,000 Rs. of your own money for a SBM type toilet?” ... “If no, how much would you pay for an SBM toilet (of your own money)?”<br>Distribution of responses: |                                 |                                 |
| If only for free                                                                                                                                                                                                                                                                                                                                                                                                     | 0.22                            | 0.31                            |
| More than 0 Rs. but than 6000 Rs.                                                                                                                                                                                                                                                                                                                                                                                    | 0.13                            | 0.06                            |
| More than 6000 Rs. but less than 12000 Rs.                                                                                                                                                                                                                                                                                                                                                                           | 0.17                            | 0.18                            |
| Willing to pay 12000 Rs. or more                                                                                                                                                                                                                                                                                                                                                                                     | 0.48                            | 0.45                            |
| <b><u>Risk perception variables</u></b>                                                                                                                                                                                                                                                                                                                                                                              |                                 |                                 |
| <i>Perceived general threats</i> – question: “From the following list name the two most serious problems” Options: water scarcity, shortages of food, diarrheal disease outbreaks, malaria outbreaks, hikes in prices of basic commodities, losses of agricultural land or livestock.                                                                                                                                |                                 |                                 |
| <i>Perceived water stress</i> – share of those who selected water scarcity                                                                                                                                                                                                                                                                                                                                           | 0.34                            | 0.28                            |
| <i>Diarrhoea perceived as a threat</i> – share of those who selected diarrheal disease outbreaks                                                                                                                                                                                                                                                                                                                     | 0.50                            | 0.17                            |
| <i>OD perceived as risk for health</i> – share of those who reported health risk among OD disadvantages                                                                                                                                                                                                                                                                                                              | 0.63                            | 0.66                            |

**Supplementary material S4:** Toilet construction under SBM in the surveyed Panchayats according to the SBM official data

|                               | Baseline SBM survey | 2015-16  | 2016-17    | 2017-18    | 2018-19    |
|-------------------------------|---------------------|----------|------------|------------|------------|
| Households without toilets    | 9527                | 8908     | 4106       | 3025       | 0          |
| Toilets constructed under SBM | 0                   | 619 (7%) | 4802 (50%) | 1081 (11%) | 3025 (32%) |

Note: According to the official SBM data, there were 9527 (93%) households without toilets and 1514

(7%) households with toilets before the SBM implementation in the surveyed panchayats. Source:

SBM Target vs Achievement Report accessed on January 3, 2021, through:

[https://sbm.gov.in/sbmReport/Report/Physical/SBM\\_TargetVsAchievementWithout1314.aspx](https://sbm.gov.in/sbmReport/Report/Physical/SBM_TargetVsAchievementWithout1314.aspx)
